# Supplementary material for: Single time point comparisons in longitudinal randomized controlled trials: power and bias in the presence of missing data
Source: PubMed Central journal article supplement (PMC4828848; doi:10.1186/s12874-016-0144-0), 2016-04-12
Supplement: 12874_2016_144_MOESM2_ESM.pdf [file 12874_2016_144_MOESM2_ESM.pdf]

```

*evaluate the performance of the t-test and MMRM in terms of bias and power;

libname dbox 'c:\simulations\results';

%let true = 4.18;

%macro readresults(data);

data Tmeans_&data&vare; set dbox.Tmeans_&data&vare; run;

data Tpvalues_&data&vare; set dbox.Tpvalues_&data&vare; run;

data MMRMCS_&data&vare; set dbox.MMRMCS_&data&vare; run;

data MMRMUN_&data&vare; set dbox.MMRMUN_&data&vare; run;

*calculate bias;
data tbias;
  set Tmeans_&data&vare;
  if class='Diff (1-2)';
  bias = (-1*mean - &>true);*estimated mean diff - true difference in means;
  biaspct = ((-1*mean - &true)/&true) *100;*percent bias;
run;
*report bias;
title "&data&vare - t-test BIAS";
proc means data=tbias n min p25 median p75 max mean std maxdec=4;
  var bias biaspct;
  output out=table&data&vare;
run;
*indicator var for reject H0 at 0.05 significance;
data tpower;
  set Tpvalues_&data&vare;
  if method='Pooled';
  RejectH0 = (Probt < 0.05);*H0: same mean Y for treatment and control groups at timepoint 4;
run;
*report power: proportion: (# that reject H0)/NumSamples;

```

```

title "&data&vare - t-test POWER";
proc freq data=tpower;
  tables RejectH0 / nocum;
run;
*****;
**MM CS;
data mmcsresult;
  set MMRMCS_&data&vare;
  bias = (estimate - &true);
  biaspct = ((estimate - &true)/&true) *100;
  RejectH0 = (Probt < 0.05);
run;
title "&data&vare - MM CS BIAS";
proc means data=mmcsresult n min p25 median p75 max mean std maxdec=4;
  var bias biaspct;
  output out=tablemmcs&data&vare;
run;
title "&data&vare - MM CS POWER";
proc freq data=mmcsresult;
  tables RejectH0 / nocum;
run;

**MM UN;
data mmunresult;
  set MMRMUN_&data&vare;
  bias = (estimate - &true);
  biaspct = ((estimate - &true)/&true) *100;
  RejectH0 = (Probt < 0.05);
run;
title "&data&vare - MM UN BIAS";
proc means data=mmunresult n min p25 median p75 max mean std maxdec=4;
  var bias biaspct;
  output out=tablemmun&data&vare;
run;
title "&data&vare - MM UN POWER";
proc freq data=mmunresult;
  tables RejectH0 / nocum;
run;

```

```

data tablebias&data&vare;
  length sim $10;
  set table&data&vare(in=t)
      tablemcs&data&vare(in=cs)
      tablemun&data&vare(in=un);
  if t then method='t-test ';
  else if cs then method='MMRM-CS';
  else if un then method='MMRM-UN';

  sim="&data";
  vare="&vare";
run;

proc append base=table force data=tablebias&data&vare; run;
%mend;

%macro maketable(vare);
  %let vare = &vare;

  %readresults(wide);

  %readresults(wideMCAR);

  %readresults(wideMARA4);

  %readresults(wideMARB4);

  %readresults(wideMAR34);

  %readresults(wideMNARa);

  %readresults(wideMNARb);

  %readresults(wideMNAR5);
%mend;

ods html close;

```

```

ods html;
title ' ';
%maketable(33);*within-person variance (rho=.7);
%maketable(55);*within-person variance (rho=.5);
%maketable(77);*within-person variance (rho=.3);

*run all three values of rho first;
*then table the results with the code below;

proc sort data=table; by vare sim method; run;
data tableit(keep=order1 order2 sim method vare meanbias meanbiaspct minbias minbiaspct maxbias maxbiaspct);
  length order1 order2 8 vare $2;
  do until(last.method);
    set table;
    by vare sim method;

    if sim='wide' then order1= 1 ;
    else if sim='wideMCAR' then order1= 2 ;
    else if sim='wideMARA4' then order1= 3 ;
    else if sim='wideMARB4' then order1= 4 ;
    else if sim='wideMAR34' then order1= 5 ;
    else if sim='wideMNARa' then order1= 6 ;
    else if sim='wideMNARb' then order1= 7 ;
    else if sim='wideMNAR5' then order1= 8 ;

    if method='t-test' then order2=1;
    else if method='MMRM-CS' then order2=2;
    else if method='MMRM-UN' then order2=3;

    if _stat_='MEAN' then do;
      meanbias=bias;
      meanbiaspct=biaspct;
    end;
    else if _stat_='MIN' then do;
      minbias=bias;
      minbiaspct=biaspct;
    end;
  end;
run;
ods html close;

```

```
        end;
        else if _stat_='MAX' then do;
            maxbias=bias;
            maxbiaspct=biaspct;
        end;
    end;
run;
proc sort data=tableit; by vare order1 order2; run;

data dbox.tableit;
    set tableit;
run;
```
